# Supplementary material for: In vitro dipeptidyl peptidase IV inhibitory activity and in situ insulinotropic activity of milk and egg white protein digests
Source: Royal Society of Chemistry journal article supplement (doi:10.1039/d1fo00641j), 2021-01-01
Supplement: d1fo00641j1.pdf [file d1fo00641j1.pdf]

***In vitro* dipeptidyl peptidase IV inhibitory activity and *in situ* insulinotropic activity of milk  
and egg white protein digests**

Marta Santos-Hernández<sup>1,2</sup>, María Cermeño<sup>2</sup>, Isidra Recio<sup>1</sup>, Richard J. FitzGerald<sup>2\*</sup>

<sup>1</sup> Institute of Food Science Research, CIAL (CSIC-UAM), Nicolás Cabrera, 9, 28049 Madrid, Spain

<sup>2</sup> Department of Biological Sciences, University of Limerick, Castletroy, Limerick, Ireland

\*To whom correspondence should be addressed. E-mail: dick.fitzgerald@ul.ie

## 1. Cell viability

The methodology is described in the manuscript.

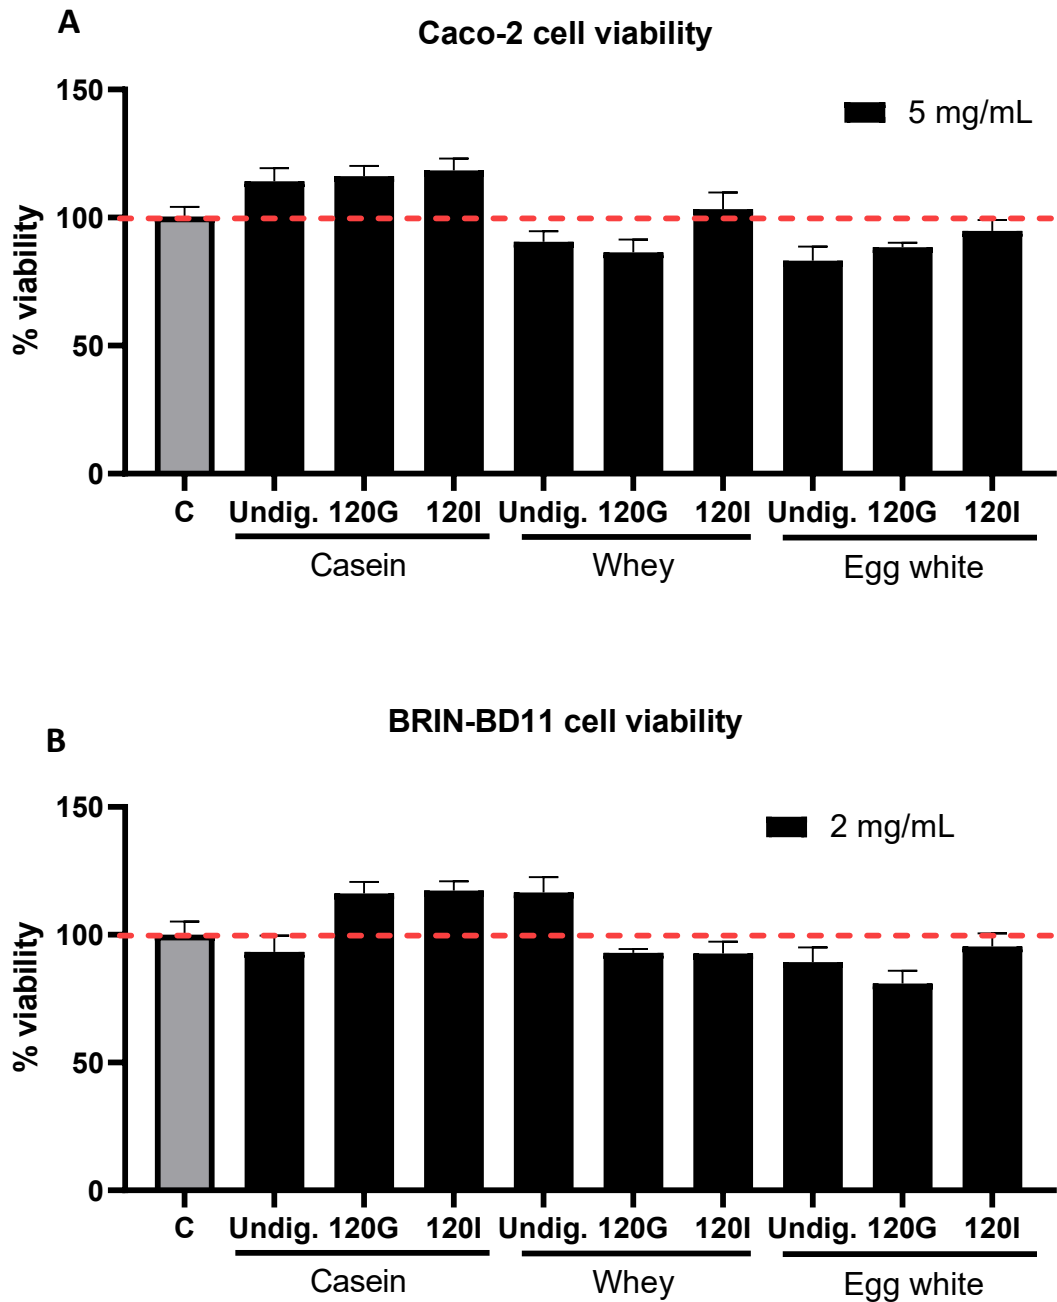

**Supplementary Figure 1:** Cell viability of milk and egg white protein gastric (120G) and intestinal (120I) digests, and undigested (Undig.) samples after 2 h incubation in (A) Caco-2 cell line or (B) BRIN-BD11 cells (mean  $\pm$  SEM, n=3). Control (C) was the buffer used for the dilution of the samples, Hanks' Balance Salt Solution (HBSS). There is no statistical significance in comparison with control (HBSS buffer, C) (one-way ANOVA with Tukey's post hoc test).

## 2. Micrographs of cell monolayers

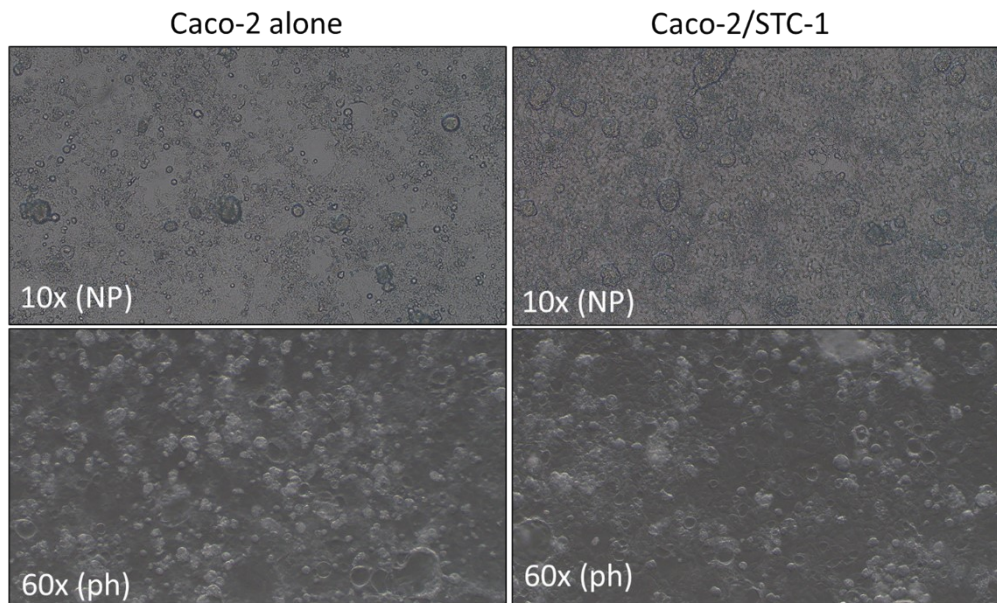

**Supplementary Figure 2:** Micrographs of the Caco-2 cell (left) and Caco-2/STC-1 cell (right) monolayers following 23 days of culture.

### 3. TEER measurement values

**Supplementary Table 1:** Transepithelial resistance (TEER) values of the two-tiered transport model before and after the incubation of the gastric (120G), intestinal (120I) digests or undigested (Undig.) samples of egg white and whey protein. Only values of more than 700  $\Omega\cdot\text{cm}^{-2}$  were considered for the experiments.

|                  |                  | TEER ( $\Omega\cdot\text{cm}^{-2}$ ) |       |                          |       |
|------------------|------------------|--------------------------------------|-------|--------------------------|-------|
|                  |                  | Caco-2 / BRIN-BD11                   |       | Caco-2-STC-1 / BRIN-BD11 |       |
|                  |                  | Before                               | After | Before                   | After |
| Control          |                  | 1270                                 | 1170  | 1230                     | 1060  |
|                  |                  | 780                                  | 745   | 1050                     | 850   |
|                  |                  | 800                                  | 800   |                          |       |
| Whey protein     | W 120G 2mg/mL    | 1280                                 | 1150  | 1800                     | 1520  |
|                  |                  | 1190                                 | 1640  | 1930                     | 1550  |
|                  |                  | 1270                                 | 1170  |                          |       |
|                  | W 120I 2mg/mL    | 1400                                 | 1200  | 1620                     | 1460  |
|                  |                  | 1300                                 | 1270  | 1600                     | 1510  |
|                  |                  | 1330                                 | 1450  | 1610                     | 1460  |
| Egg white        | EW 120G 2mg/mL   | 1520                                 | 1440  | 1430                     | 1030  |
|                  |                  | 1640                                 | 1500  | 1330                     | 1070  |
|                  |                  | 1570                                 | 1550  |                          |       |
|                  | EW 120I 2mg/mL   | 1560                                 | 1350  | 1460                     | 1270  |
|                  |                  | 1500                                 | 1360  | 1370                     | 1550  |
|                  |                  | 1650                                 | 1640  | 1300                     | 1260  |
| Whey protein     | W U 2mg/mL       | 1660                                 | 1500  |                          |       |
|                  |                  | 1740                                 | 1500  |                          |       |
|                  |                  | 1650                                 | 1490  |                          |       |
|                  | W U 0.2mg/mL     | 1430                                 | 1640  |                          |       |
|                  |                  | 1410                                 | 1480  |                          |       |
|                  | W 120G 0.2mg/mL  | 1670                                 | 1500  |                          |       |
| 1640             |                  | 1500                                 |       |                          |       |
| W 120I 0.2mg/mL  | 996              | 950                                  |       |                          |       |
|                  | 1080             | 910                                  |       |                          |       |
| Egg white        | EW U 2mg/mL      | 1060                                 | 730   |                          |       |
|                  |                  | 1140                                 | 760   |                          |       |
|                  | EW U 0.2mg/mL    | 980                                  | 800   |                          |       |
|                  |                  | 1100                                 | 1080  |                          |       |
|                  | EW 120G 0.2mg/mL | 980                                  | 800   |                          |       |
|                  |                  | 1380                                 | 1110  |                          |       |
|                  |                  | 1290                                 | 1030  |                          |       |
|                  |                  | 1160                                 | 1080  |                          |       |
| EW 120I 0.2mg/mL | 1280             | 960                                  |       |                          |       |
|                  | 1210             | 930                                  |       |                          |       |

## 1. Analysis by UPLC-tandem mass spectrometry

**Supplementary Table 2:** peptides identified in the basolateral fraction after 2h incubation with the intestinal digest (120I) of egg white (EW) or whey protein (W) in Caco-2 cell monolayers.

|                | <b>Protein</b>         | <b>ID protein</b> | <b>Range</b>  | <b>Sequence</b> |
|----------------|------------------------|-------------------|---------------|-----------------|
| <b>EW 120I</b> | Ovalbumin              | P01012            | 10 15         | EFCFDV          |
|                |                        |                   | 329 333       | HAAHA           |
|                | Ovotransferrin         | P02789            | 117 121       | VKKGT           |
|                |                        |                   | 235 245       | NAPDQKDEYEL     |
|                |                        |                   | 420 424       | TAGVC           |
|                |                        |                   | 509 513       | PGSPP           |
|                |                        |                   | 521 525       | CQGSG           |
|                | Mucin-6                | F1NBL0            | 84 92         | NGIQIAPYG       |
|                |                        |                   | 90 97         | PYGRSVRL        |
|                |                        |                   | 157 165       | ALQKMDDPS       |
|                |                        |                   | 258 267       | SANQIYEECG      |
|                |                        |                   | 314 325       | CTLNGETYAPGD    |
|                |                        |                   | 394 398       | YEKSG           |
|                |                        |                   | 485 490       | LGLCGN          |
|                |                        |                   | 507 511       | EGTAS           |
| 820 824        |                        |                   | SSTCN         |                 |
| 820 827        |                        |                   | SSTCNLYG      |                 |
| 871 883        |                        |                   | ICGKSGVTCSRSI |                 |
| 930 937        |                        |                   | NMTLIWNK      |                 |
| 1042 1048      |                        |                   | RDSCGCD       |                 |
| <b>W 120I</b>  | $\beta$ -lactoglobulin | P02754            | 11 15         | TCGAQ           |
|                |                        |                   | 23 27         | MKGLD           |
|                |                        |                   | 52 56         | SAPLR           |
|                | $\alpha_{s1}$ -casein  | P02662            | 127 131       | VPNSA           |
